# Supplementary material for: Improved Pharmacokinetics of Icariin (ICA) within Formulation of PEG-PLLA/PDLA-PNIPAM Polymeric Micelles
Source: MDPI journal article supplement (doi:10.3390/pharmaceutics11020051), 2019-01-25
Supplement: s1 [file s1]

# Supplementary Materials: Improved Pharmacokinetics of Icarin (ICA) within Formulation of PEG-PLLA/PDLA-PNIPAM Polymeric Micelles

Lu-Ying Han, Yun-Long Wu, Chun-Yan Zhu, Cai-Sheng Wu and Chun-Rong Yang

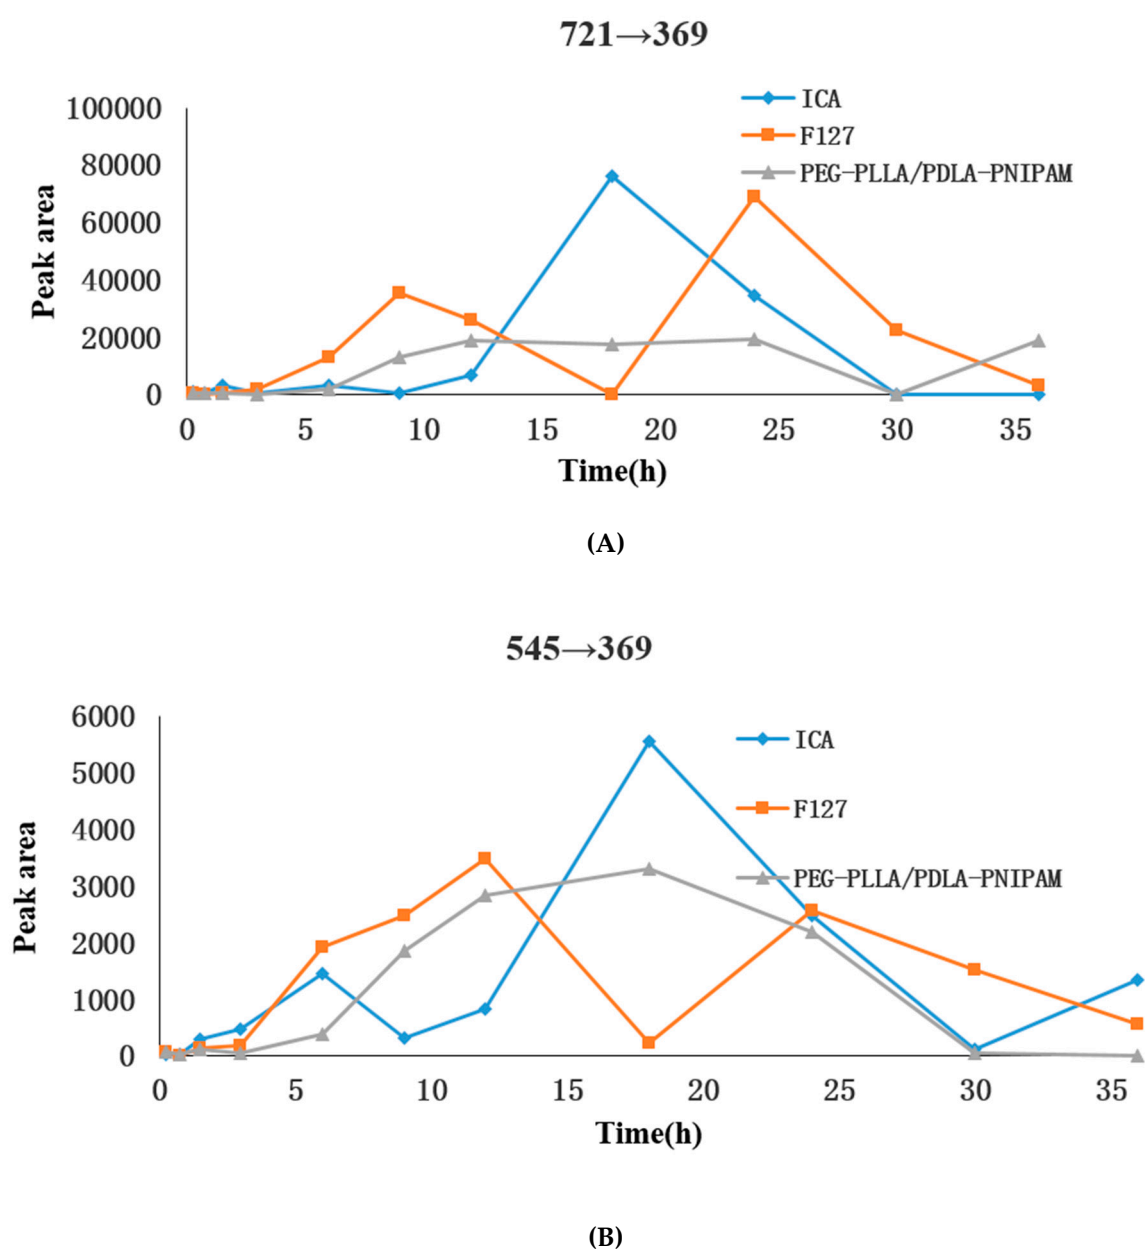

Figure S1. ICA in vivo metabolite product line chart. (A) 721→369; (B) 545→369.
